# Supplementary material for: The BACE‐1 inhibitor CNP520 for prevention trials in Alzheimer's disease
Source: PubMed Central journal article supplement (PMC6220303; doi:10.15252/emmm.201809316), 2018-09-17
Supplement: EMMM-10-e9316-s002.pdf [file EMMM-10-e9316-s002.pdf]

## Expanded View Figures

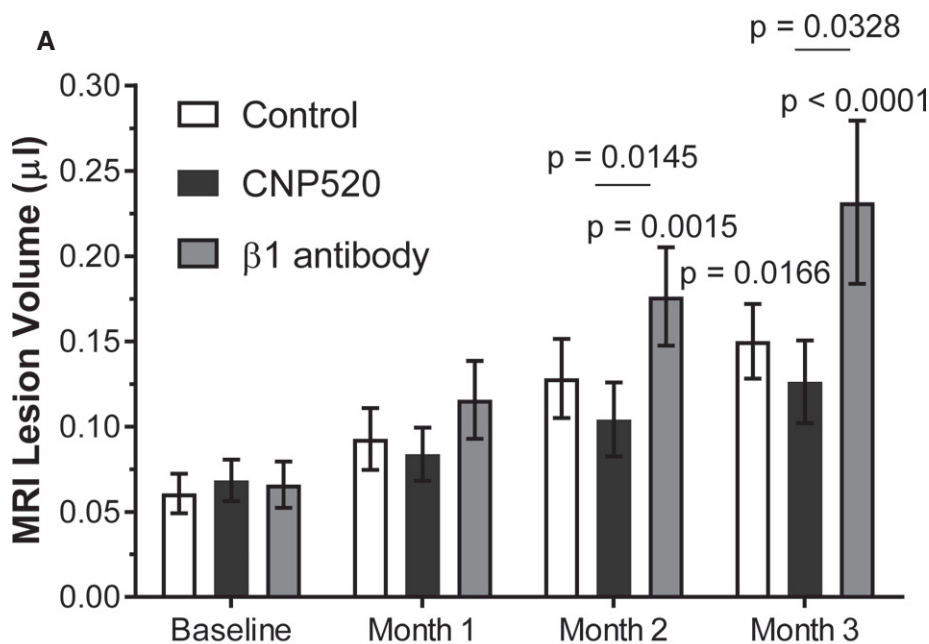

**B**

|                               | control | CNP520 | $\beta 1$<br>antibody |
|-------------------------------|---------|--------|-----------------------|
| animals /<br>group            | 19      | 15     | 18                    |
| Hemosiderin (Perl's staining) |         |        |                       |
| Grade 1                       | 9       | 7      | 18                    |
| Grade 2                       | 1       | 0      | 0                     |
| % affected                    | 53      | 47     | 100                   |
| Hemorrhage (H & E staining)   |         |        |                       |
| Grade 1                       | 6       | 1      | 5                     |
| Grade 2                       | 0       | 0      | 1                     |
| % affected                    | 32      | 7      | 33                    |

**Figure EV1. Assessment of intracerebral micro-hemorrhages in APP23-transgenic mice, dosed orally with CNP520 at 30 mg/kg for 3 months.**

- A** Assessment of brain lesion volume by longitudinal magnetic resonance imaging. For description of the method, see Beckmann *et al* (2016). White bars show the APP23-typical age-dependent increase in lesion volume, and black bars show the effect of CNP520. The antibody  $\beta 1$  serves as positive control and shows enhancement of lesion volume over time. ANOVA test with random effects was applied. Shown is average  $\pm$  SEM; for  $n$  numbers, see table in panel (B). Non-underlined  $P$ -values: comparison to baseline, only significant differences are shown. Underlined  $P$ -values: significant differences between treatment groups at the given time point.
- B** Results of histopathological staining using Perl's staining and H&E staining. APP23 (21 months of age) was sacrificed; four brain sections were processed and stained with hematoxylin and eosin (H&E) and Prussian blue for hemosiderin deposits. Levels 2, 3, and 4, and one additional slide at hypothalamus level (level 2). Brain sections stained with hematoxylin and eosin and with Perl's Prussian blue were examined under a light microscope. The distribution, size, and staining intensity of hemosiderin deposits in Perl's Prussian blue-stained sections were assessed and recorded. Table lists the number of animals affected, and the percentage.

**Figure EV2. Effect of CNP520 on microglia and astrocytes in APP23 mice.**

Mice were dosed with CNP520 in food pellets. Low dose: 0.03 g CNP520/kg food, exposure corresponds to a daily oral dose of 4 mg/kg. High dose: 0.3 g/kg food, exposure corresponds to a daily oral dose of 40 mg/kg. Half brains were embedded in paraffin, cut, and stained with Iba1 antibody for activated microglia and with GFAP antibody for astrocytes.

A Plaque-associated area of Iba1-positive cells.

B Non-plaque-associated Iba1-positive cells.

C Correlation of normalized plaque-associated Iba1 area with normalized plaque area. Shown is average  $\pm$  SEM; dashed lines show the 95% confidence interval.

D Correlation of normalized non-plaque-associated area with normalized plaque area. Shown is average  $\pm$  SEM; dashed lines show the 95% confidence interval.

E Plaque-associated area of GFAP-positive cells.

F Non-plaque-associated GFAP-positive cells.

G Correlation of normalized plaque-associated GFAP-positive area with normalized plaque area. Shown is average  $\pm$  SEM; dashed lines show the 95% confidence interval.

H Correlation of normalized non-plaque-associated area with normalized plaque area. Shown is average  $\pm$  SEM; dashed lines show the 95% confidence interval.

Data information: (A and B)  $n = 7$ /group. (E and F) Baseline,  $n = 10$ , vehicle:  $n = 17$ , CNP520 low dose:  $n = 14$ , CNP520 high dose:  $n = 13$ . One way ANOVA with Dunnett's multiple comparison test was used in panels (A, B, E, and F).

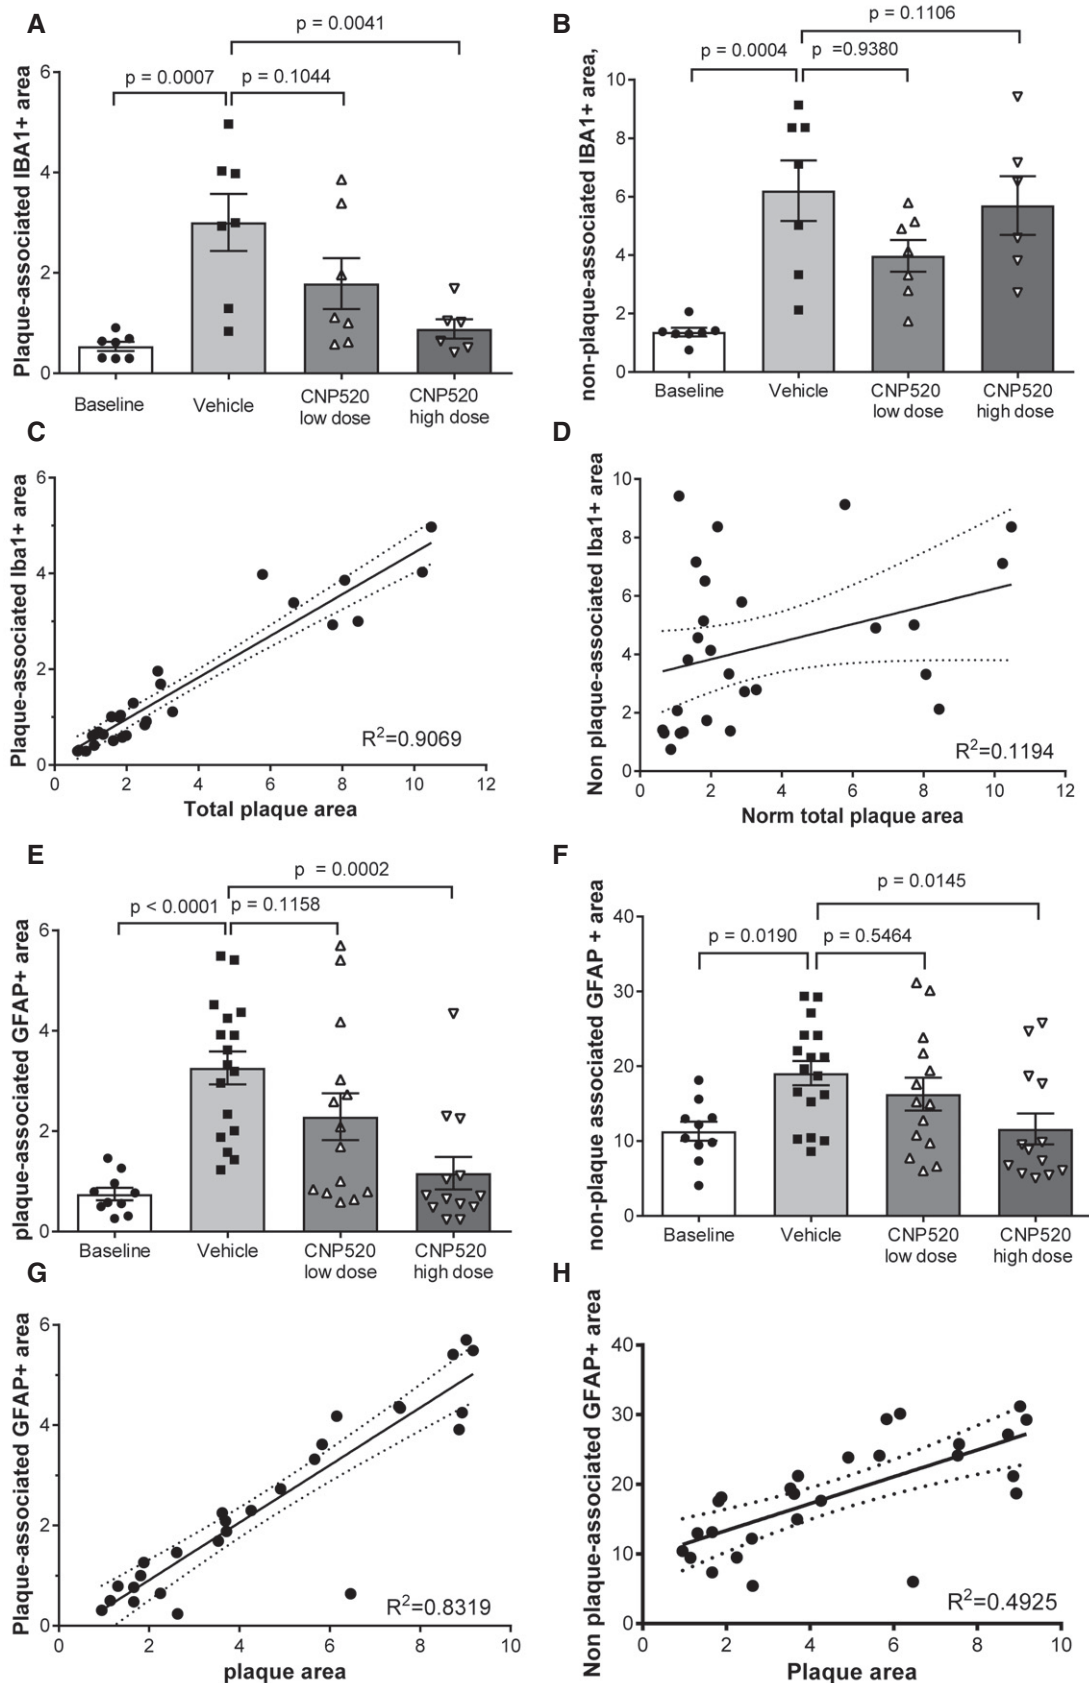

Figure EV2.

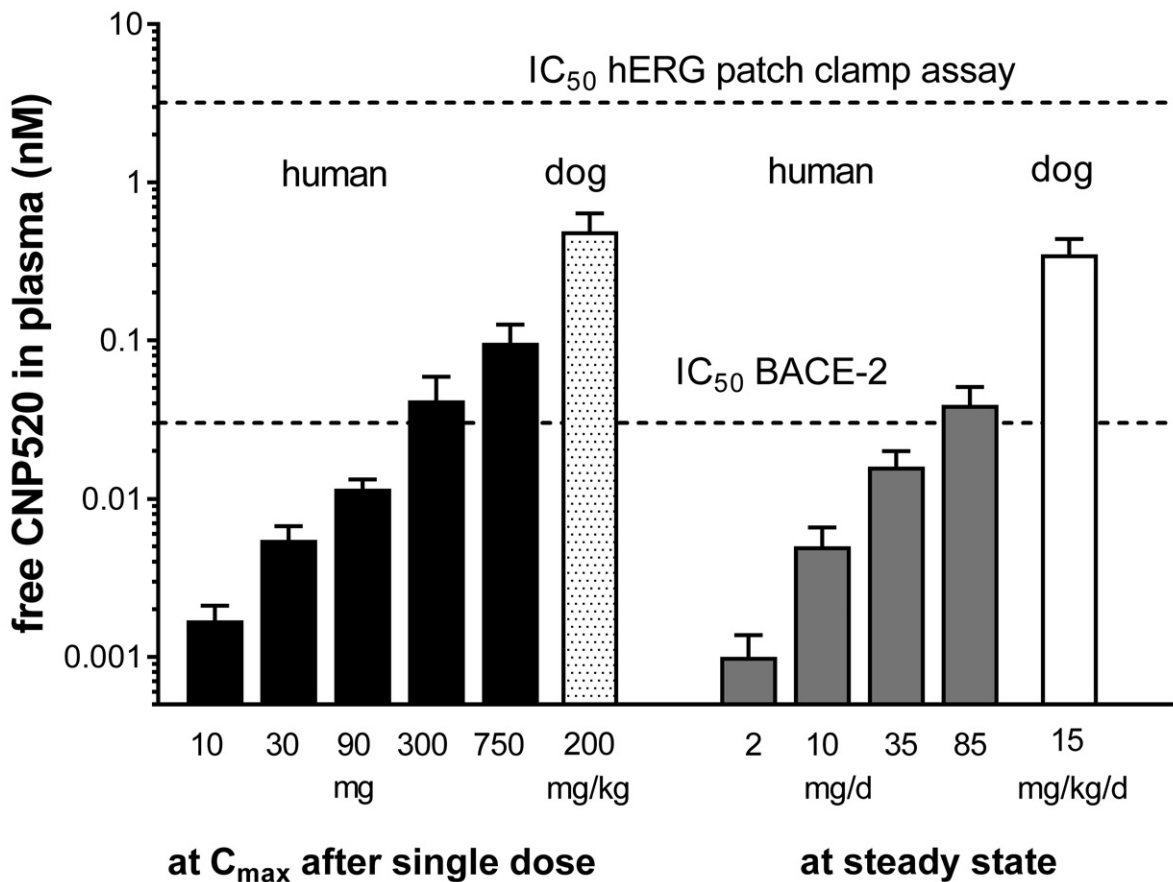

**Figure EV3. Free (unbound) CNP520 plasma exposure in humans, relative to the *in vitro* IC<sub>50</sub> value for hERG and BACE-2 inhibition.**  
 Shown are maximum free CNP520 levels after a single dose, in humans and in dogs, and steady-state exposure after 3-month dosing in human and 9-month dosing in dogs. Shown is mean ± coefficient of variation. Human single dose: n = 8/dose, human steady state: n = 25/dose, dog single dose: n = 4, dog steady state: n = 5.
